# Supplementary material for: Multicentric pilot study to standardize clinical whole exome sequencing (WES) for cancer patients
Source: PubMed Central journal article supplement (PMC10589320; doi:10.1038/s41698-023-00457-x), 2023-10-20
Supplement: 41698_2023_457_MOESM1_ESM.pdf [file 41698_2023_457_MOESM1_ESM.pdf]

### Supplementary Figure 1

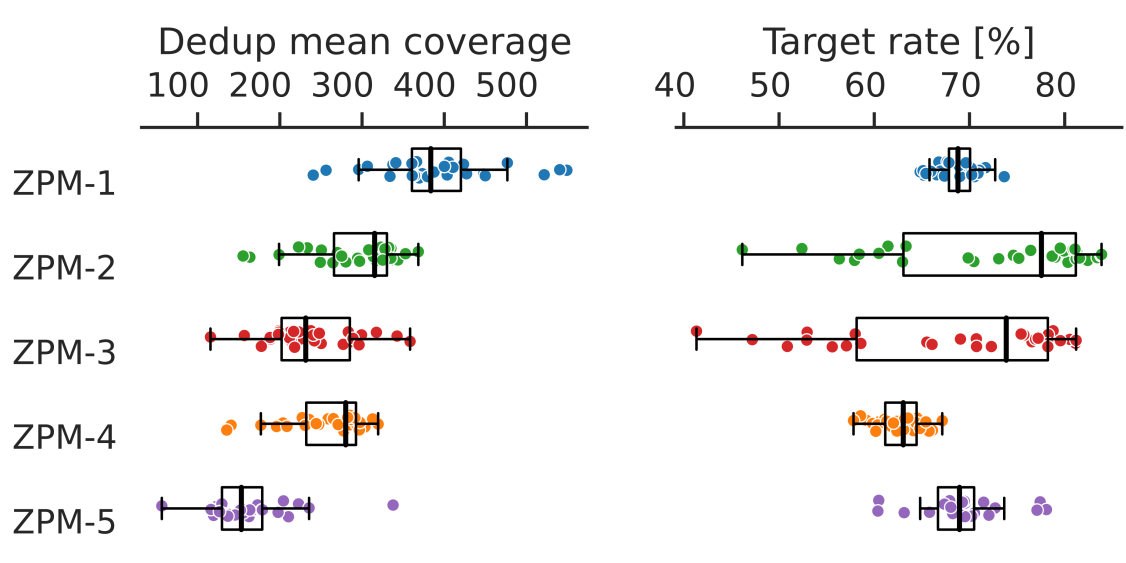

Quality measurements of the participating institutions with on-target rates and mean coverages after duplication for each sample. Boxplots show the median, upper and lower quartiles and whiskers up to 1.5 times of the box size.

### Supplementary Figure 2

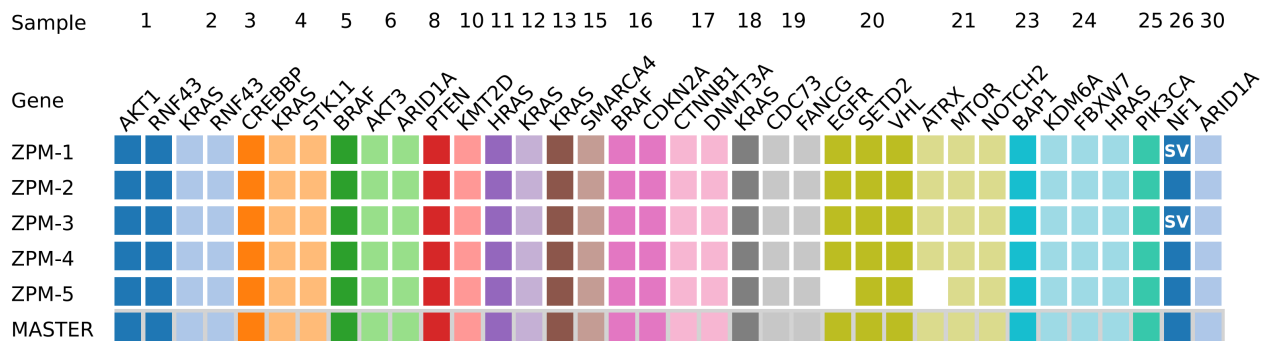

Comparison of therapeutically relevant variants reported in the DKFZ/NCT/DTKK MASTER program to variants found by the participating institutions.

### Supplementary Figure 3

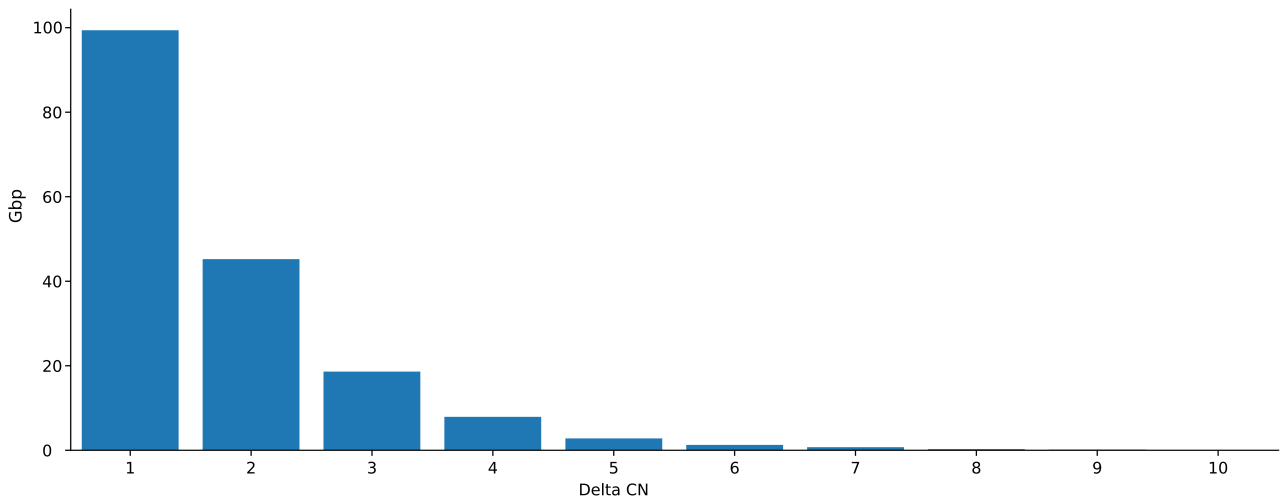

Differences of copy numbers between institutions for non-matching genomic regions.

### Supplementary Figure 4

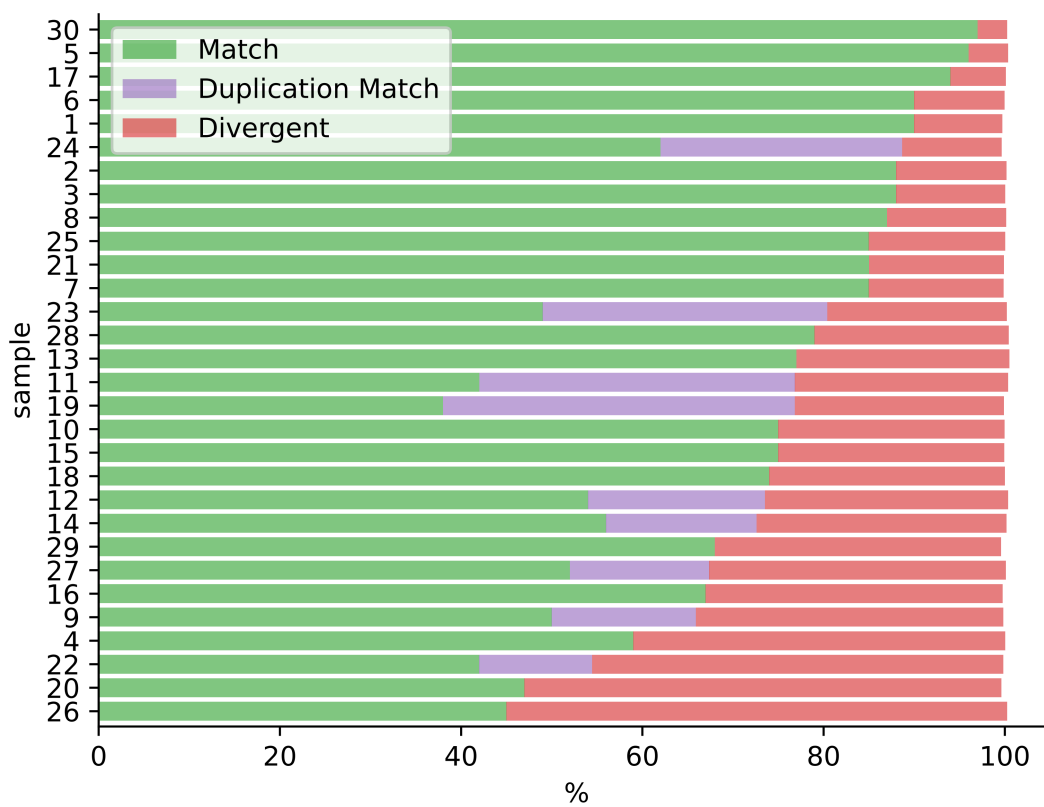

Analysis of copy number calls from all institutions using the same pipeline. In comparison to Figure 4 a no significant improvement is observed by using the same pipeline.

### Supplementary Figure 5

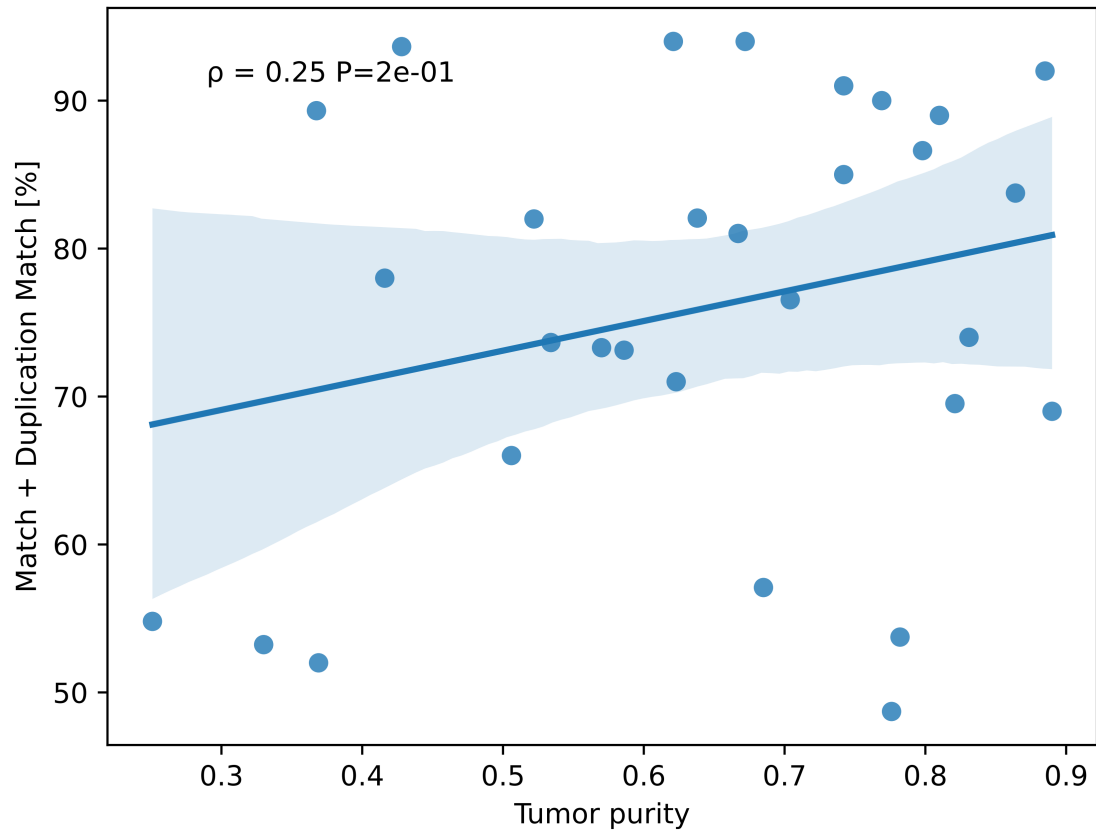

Agreement of copy number changes in contrast to tumor purity. The correlation shows an increased agreement for samples with high tumor purity.

**Supplementary Table 1**

| <b>Pseudonym</b> | <b>Entity</b>                                       | <b>Tumor purity (Pathologist)</b> |
|------------------|-----------------------------------------------------|-----------------------------------|
| ZPMWES-T1        | Adenocarcinoma of the appendix                      | 64                                |
| ZPMWES-T10       | Parathyroid carcinoma                               | 81                                |
| ZPMWES-T11       | Thymic squamous cell carcinoma                      | 56                                |
| ZPMWES-T12       | Adenocarcinoma of the rectum                        | 68                                |
| ZPMWES-T13       | Adenocarcinoma of the colon                         | 54                                |
| ZPMWES-T14       | Carcinosarcoma (MMMT) of the uterus                 | 81                                |
| ZPMWES-T15       | Adenocarcinoma of the lung                          | 54                                |
| ZPMWES-T16       | Papillary thyroid carcinoma                         | 55                                |
| ZPMWES-T17       | Desmoid fibromatosis                                | 80                                |
| ZPMWES-T18       | Adenocarcinoma of the colon                         | 50                                |
| ZPMWES-T19       | Parathyroid carcinoma                               | 60                                |
| ZPMWES-T2        | Adenocarcinoma of the appendix                      | 72                                |
| ZPMWES-T20       | Sarcomatoid renal cell carcinoma                    | 81                                |
| ZPMWES-T21       | Parathyroid carcinoma                               | 52                                |
| ZPMWES-T22       | Sarcoma, NOS                                        | 55                                |
| ZPMWES-T23       | Epithelioid pleural mesothelioma                    | 54                                |
| ZPMWES-T24       | Salivary duct carcinoma of the parotid              | 52                                |
| ZPMWES-T25       | Basal cell adenocarcinoma of the parotid            | 75                                |
| ZPMWES-T26       | High grade serous carcinoma of the ovary            | 56                                |
| ZPMWES-T27       | Nonseminomatous mixed germ cell tumor of the testis | 76                                |
| ZPMWES-T28       | Adult granulosa cell tumor malignant                | 76                                |
| ZPMWES-T29       | NUT carcinoma of the paranasal sinus                | 63                                |
| ZPMWES-T3        | Juvenile granulosa cell tumor of the ovary          | 46                                |
| ZPMWES-T30       | Angiosarcoma of the breast                          | 55                                |
| ZPMWES-T4        | Ductal adenocarcinoma of the pancreas               | 58                                |
| ZPMWES-T5        | Papillary thyroid carcinoma                         | 76                                |
| ZPMWES-T6        | Neuroendocrine tumor (NET, G2) of the lung          | 59                                |
| ZPMWES-T7        | Thymoma                                             | 56                                |
| ZPMWES-T8        | Intrahepatic cholangiocarcinoma                     | 52                                |
| ZPMWES-T9        | Mixed germ cell tumor of the testis                 | 90                                |

Supplementary Table 2

| Case                                 | ZPM-1<br>DNA [ng]                                                                                                                                                                                                                                                                                                                                                                                                                                                                                                                                                                                                                                                  | ZPM-3<br>DNA [ng]                                                               | ZPM-4<br>DNA [ng]                                                                                                                                                                                                    | ZPM-5<br>DNA [ng] T/N                                                                                                                                                                                                                                                                                                                                              |
|--------------------------------------|--------------------------------------------------------------------------------------------------------------------------------------------------------------------------------------------------------------------------------------------------------------------------------------------------------------------------------------------------------------------------------------------------------------------------------------------------------------------------------------------------------------------------------------------------------------------------------------------------------------------------------------------------------------------|---------------------------------------------------------------------------------|----------------------------------------------------------------------------------------------------------------------------------------------------------------------------------------------------------------------|--------------------------------------------------------------------------------------------------------------------------------------------------------------------------------------------------------------------------------------------------------------------------------------------------------------------------------------------------------------------|
| 1                                    | 100                                                                                                                                                                                                                                                                                                                                                                                                                                                                                                                                                                                                                                                                | 100                                                                             | 178                                                                                                                                                                                                                  | 100/100                                                                                                                                                                                                                                                                                                                                                            |
| 2                                    | 100                                                                                                                                                                                                                                                                                                                                                                                                                                                                                                                                                                                                                                                                | 100                                                                             | 116                                                                                                                                                                                                                  | 100/100                                                                                                                                                                                                                                                                                                                                                            |
| 3                                    | 100                                                                                                                                                                                                                                                                                                                                                                                                                                                                                                                                                                                                                                                                | 100                                                                             | 37                                                                                                                                                                                                                   | 100/100                                                                                                                                                                                                                                                                                                                                                            |
| 4                                    | 100                                                                                                                                                                                                                                                                                                                                                                                                                                                                                                                                                                                                                                                                | 100                                                                             | 118                                                                                                                                                                                                                  | 100/100                                                                                                                                                                                                                                                                                                                                                            |
| 5                                    | 100                                                                                                                                                                                                                                                                                                                                                                                                                                                                                                                                                                                                                                                                | 100                                                                             | 116                                                                                                                                                                                                                  | 100/100                                                                                                                                                                                                                                                                                                                                                            |
| 6                                    | 100                                                                                                                                                                                                                                                                                                                                                                                                                                                                                                                                                                                                                                                                | 100                                                                             | 84                                                                                                                                                                                                                   | 100/100                                                                                                                                                                                                                                                                                                                                                            |
| 7                                    | 100                                                                                                                                                                                                                                                                                                                                                                                                                                                                                                                                                                                                                                                                | 100                                                                             | 120                                                                                                                                                                                                                  | 100/100                                                                                                                                                                                                                                                                                                                                                            |
| 8                                    | 100                                                                                                                                                                                                                                                                                                                                                                                                                                                                                                                                                                                                                                                                | 100                                                                             | 108                                                                                                                                                                                                                  | 100/100                                                                                                                                                                                                                                                                                                                                                            |
| 9                                    | 100                                                                                                                                                                                                                                                                                                                                                                                                                                                                                                                                                                                                                                                                | 100                                                                             | 112                                                                                                                                                                                                                  | 100/100                                                                                                                                                                                                                                                                                                                                                            |
| 10                                   | 100                                                                                                                                                                                                                                                                                                                                                                                                                                                                                                                                                                                                                                                                | 100                                                                             | 110                                                                                                                                                                                                                  | 100/100                                                                                                                                                                                                                                                                                                                                                            |
| 11                                   | 100                                                                                                                                                                                                                                                                                                                                                                                                                                                                                                                                                                                                                                                                | 100                                                                             | 106                                                                                                                                                                                                                  | 100/100                                                                                                                                                                                                                                                                                                                                                            |
| 12                                   | 100                                                                                                                                                                                                                                                                                                                                                                                                                                                                                                                                                                                                                                                                | 100                                                                             | 112                                                                                                                                                                                                                  | 100/100                                                                                                                                                                                                                                                                                                                                                            |
| 13                                   | 100                                                                                                                                                                                                                                                                                                                                                                                                                                                                                                                                                                                                                                                                | 100                                                                             | 112                                                                                                                                                                                                                  | 100/100                                                                                                                                                                                                                                                                                                                                                            |
| 14                                   | 100                                                                                                                                                                                                                                                                                                                                                                                                                                                                                                                                                                                                                                                                | 100                                                                             | 106                                                                                                                                                                                                                  | 100/100                                                                                                                                                                                                                                                                                                                                                            |
| 15                                   | 100                                                                                                                                                                                                                                                                                                                                                                                                                                                                                                                                                                                                                                                                | 100                                                                             | 106                                                                                                                                                                                                                  | 100/100                                                                                                                                                                                                                                                                                                                                                            |
| 16                                   | 100                                                                                                                                                                                                                                                                                                                                                                                                                                                                                                                                                                                                                                                                | 100                                                                             | 104                                                                                                                                                                                                                  | 100/100                                                                                                                                                                                                                                                                                                                                                            |
| 17                                   | 100                                                                                                                                                                                                                                                                                                                                                                                                                                                                                                                                                                                                                                                                | 100                                                                             | 157                                                                                                                                                                                                                  | 100/100                                                                                                                                                                                                                                                                                                                                                            |
| 18                                   | 100                                                                                                                                                                                                                                                                                                                                                                                                                                                                                                                                                                                                                                                                | 100                                                                             | 110                                                                                                                                                                                                                  | 100/100                                                                                                                                                                                                                                                                                                                                                            |
| 19                                   | 100                                                                                                                                                                                                                                                                                                                                                                                                                                                                                                                                                                                                                                                                | 100                                                                             | 112                                                                                                                                                                                                                  | 100/100                                                                                                                                                                                                                                                                                                                                                            |
| 20                                   | 100                                                                                                                                                                                                                                                                                                                                                                                                                                                                                                                                                                                                                                                                | 100                                                                             | 165                                                                                                                                                                                                                  | 100/100                                                                                                                                                                                                                                                                                                                                                            |
| 21                                   | 100                                                                                                                                                                                                                                                                                                                                                                                                                                                                                                                                                                                                                                                                | 100                                                                             | 110                                                                                                                                                                                                                  | 100/100                                                                                                                                                                                                                                                                                                                                                            |
| 22                                   | 100                                                                                                                                                                                                                                                                                                                                                                                                                                                                                                                                                                                                                                                                | 100                                                                             | 56                                                                                                                                                                                                                   | 100/100                                                                                                                                                                                                                                                                                                                                                            |
| 23                                   | 100                                                                                                                                                                                                                                                                                                                                                                                                                                                                                                                                                                                                                                                                | 100                                                                             | 116                                                                                                                                                                                                                  | 100/100                                                                                                                                                                                                                                                                                                                                                            |
| 24                                   | 100                                                                                                                                                                                                                                                                                                                                                                                                                                                                                                                                                                                                                                                                | 100                                                                             | 114                                                                                                                                                                                                                  | 100/100                                                                                                                                                                                                                                                                                                                                                            |
| 25                                   | 100                                                                                                                                                                                                                                                                                                                                                                                                                                                                                                                                                                                                                                                                | 100                                                                             | 110                                                                                                                                                                                                                  | 100/100                                                                                                                                                                                                                                                                                                                                                            |
| 26                                   | 100                                                                                                                                                                                                                                                                                                                                                                                                                                                                                                                                                                                                                                                                | 100                                                                             | 114                                                                                                                                                                                                                  | 100/100                                                                                                                                                                                                                                                                                                                                                            |
| 27                                   | 100                                                                                                                                                                                                                                                                                                                                                                                                                                                                                                                                                                                                                                                                | 100                                                                             | 108                                                                                                                                                                                                                  | 100/100                                                                                                                                                                                                                                                                                                                                                            |
| 28                                   | 100                                                                                                                                                                                                                                                                                                                                                                                                                                                                                                                                                                                                                                                                | 100                                                                             | 110                                                                                                                                                                                                                  | 100/100                                                                                                                                                                                                                                                                                                                                                            |
| 29                                   | 100                                                                                                                                                                                                                                                                                                                                                                                                                                                                                                                                                                                                                                                                | 100                                                                             | 114                                                                                                                                                                                                                  | 100/100                                                                                                                                                                                                                                                                                                                                                            |
| 30                                   | 100                                                                                                                                                                                                                                                                                                                                                                                                                                                                                                                                                                                                                                                                | 100                                                                             | 113                                                                                                                                                                                                                  | 100/100                                                                                                                                                                                                                                                                                                                                                            |
| <b>Manufacturer sequencer</b>        | Illumina                                                                                                                                                                                                                                                                                                                                                                                                                                                                                                                                                                                                                                                           | Illumina                                                                        | Illumina                                                                                                                                                                                                             | Illumina                                                                                                                                                                                                                                                                                                                                                           |
| <b>System name</b>                   | Novaseq 6000                                                                                                                                                                                                                                                                                                                                                                                                                                                                                                                                                                                                                                                       | NextSeq 550                                                                     | Novaseq 6000                                                                                                                                                                                                         | Novaseq 6000 / Nextseq 550Dx                                                                                                                                                                                                                                                                                                                                       |
| <b>Flowcell</b>                      | S2                                                                                                                                                                                                                                                                                                                                                                                                                                                                                                                                                                                                                                                                 | High Output                                                                     | SP                                                                                                                                                                                                                   | SP / S2 / High Output                                                                                                                                                                                                                                                                                                                                              |
| <b>Cycles</b>                        | 200                                                                                                                                                                                                                                                                                                                                                                                                                                                                                                                                                                                                                                                                | 300                                                                             | 200                                                                                                                                                                                                                  | 149                                                                                                                                                                                                                                                                                                                                                                |
| <b>Library</b>                       | Twist (Twist EF Library Prep 2.0)                                                                                                                                                                                                                                                                                                                                                                                                                                                                                                                                                                                                                                  | Agilent                                                                         | Twist                                                                                                                                                                                                                | Twist                                                                                                                                                                                                                                                                                                                                                              |
| <b>Manufacturer chemistry</b>        | Illumina NovaSeq 6000 S2 Rgt Kit v1.5 (200cyc)                                                                                                                                                                                                                                                                                                                                                                                                                                                                                                                                                                                                                     | NextSeq 500/550 HighOutput Kit v2.5 (300 Cycles), Cat# 20024908, Illumina       | Twist                                                                                                                                                                                                                | Twist                                                                                                                                                                                                                                                                                                                                                              |
| <b>Enrichment Kit</b>                | Twist Standard Hyb Kit, Twist Comprehensive Exome + Custom Panel<br>Design ID: TE-94167158 -20°C 101042<br><br>Twist Standard Hybridization and Wash Kit v1: 104178 (12rxn)<br>Twist EF Library Prep 2.0: 104207 (96rxn)<br><br>Twist Hybridization Reagents (Box1) -20°C<br>Twist Wash Buffers (Box2) 2-8°C<br>Twist Universal Blockers: 100578 (12rxn)<br>100767 (96rxn)<br>Universal Blockers & Blocker Solution -20°C<br>Twist Binding and Purification Beads: 100983 (12rxn)<br>100984 (96rxn)<br>Streptavidin Binding Beads<br>DNA Purification Beads 2-8°C<br>NEBNext® Ultra™ II Q5® Master Mix -20°C M0544<br>Q5® High-Fidelity DNA Polymerase -20°C M0491 | SureSelect XT Human All Exon V8                                                 | Twist Exome 2.0                                                                                                                                                                                                      | Twist Exome 2.0                                                                                                                                                                                                                                                                                                                                                    |
| <b>Enrichment Kit Catalog Number</b> |                                                                                                                                                                                                                                                                                                                                                                                                                                                                                                                                                                                                                                                                    | SSELXT Human All Exon V8, Cat. # 5191-6891, Agilent                             | Twist Universal Blockers, 12rxn, 100578<br>Twist Std Hyb and Wash Kit v2 with amp mix, 12rxn, 105560<br>Twist Dry Down Beads, 12rxn, 104325                                                                          | Twist Library Preparation Kit, Mechanical Fragmentation with amp Mix, 96 rxn 10477 1x<br>Twist Universal Adapter System Plate A 96 well 101308 1x<br>Twist Universal Blockers, 12 rxn 100578 1x<br>Twist Hybridization and Wash Kit mit Amplifikationsmix, 12 rxn 104178 1x<br>Twist Dry Down Beads 12 rxn 104325 1x<br>Twist Comprehensive Exome 12 rxn 102032 1x |
| <b>Sample Barcodes</b>               | Twist Universal Adapter System (AD153 Barcode Product Number 30-05150-00)                                                                                                                                                                                                                                                                                                                                                                                                                                                                                                                                                                                          | SureSelect XT HS2 Index Primer Pairs for ILM                                    | DT Adapter                                                                                                                                                                                                           | Twist Adapter                                                                                                                                                                                                                                                                                                                                                      |
| <b>Adapter system</b>                | Twist Universal Adapter System                                                                                                                                                                                                                                                                                                                                                                                                                                                                                                                                                                                                                                     | Universal adapter system (TruSeq)                                               | Universal adapter system                                                                                                                                                                                             | Twist Adapter System                                                                                                                                                                                                                                                                                                                                               |
| <b>Library Prep Kit</b>              | Twist Universal Adapter System TruSeq kompatibel, 16 Proben -20°C 101307<br>Platte A -20°C 101308 Platte B -20°C 101309 Platte C -20°C 101310 Platte D -20°C 101311                                                                                                                                                                                                                                                                                                                                                                                                                                                                                                | SureSelect XT HS2 DNA Reagent Kit with Index Primer Pairs, Cat# G9983A, Agilent | Twist Library Preparation Kit, Mechanical, Fragmentation with amp mix, 96rxn, 104177<br>Twist UMI Adapter System - TruSeq Comp, Sample Plate A, 96well, 105041<br>Twist Exome2.0, +CompExome spike-in, 12rxn, 105229 | Twist Library Preparation Kit, Mechanical Fragmentation with amp Mix, 96 rxn 10477<br>Twist Universal Adapter System Plate A 96 well 101308<br>Twist Universal Blockers, 12 rxn 100578<br>Twist Hybridization and Wash Kit mit Amplifikationsmix, 12 rxn 104178<br>Twist Dry Down Beads 12 rxn 104325<br>Twist Comprehensive Exome 12 rxn 102032                   |
| <b>Target regions</b>                | Twist Comprehensive Exome + Custom Panel                                                                                                                                                                                                                                                                                                                                                                                                                                                                                                                                                                                                                           | SureSelect XT Human All Exon V8 (hg19)                                          | Twist Exome 2.0                                                                                                                                                                                                      | Twist Exome 2.0                                                                                                                                                                                                                                                                                                                                                    |
| <b>UMIs</b>                          | No                                                                                                                                                                                                                                                                                                                                                                                                                                                                                                                                                                                                                                                                 | Yes                                                                             | No                                                                                                                                                                                                                   | No                                                                                                                                                                                                                                                                                                                                                                 |

Supplementary Table 2

|                  |     |                         | ZPM-1                                                                                | ZPM-2                                                                                             | ZPM-3                                                        | ZPM-4                           | ZPM-5                                                                                                        |
|------------------|-----|-------------------------|--------------------------------------------------------------------------------------|---------------------------------------------------------------------------------------------------|--------------------------------------------------------------|---------------------------------|--------------------------------------------------------------------------------------------------------------|
|                  |     | Genom                   | hg19 (liftover)                                                                      | hg19                                                                                              | hg19                                                         | hg19                            | hg19                                                                                                         |
| Biomarker        | TMB | Coverage                | 20 (3 variant reads)                                                                 | 8x (4 Varianten Reads)                                                                            | 50                                                           | 100                             | 100                                                                                                          |
|                  |     | Counting                | SNV + INDEL                                                                          | SNV + INDEL                                                                                       | SNV + INDEL                                                  | SNV + INDEL                     | SNV + INDEL                                                                                                  |
|                  |     | VAF threshold           | 0.05 in tumor && < 0.17*tumor_freq in normal                                         | 0.05                                                                                              | 0.05                                                         | 0.035                           | 0.05                                                                                                         |
|                  |     | Exone filter            | FALSE                                                                                | TRUE                                                                                              | TRUE                                                         | TRUE                            | TRUE                                                                                                         |
|                  |     | Region coverage         | 20                                                                                   | 50                                                                                                | 50                                                           | 100                             | 100                                                                                                          |
|                  | MSI | Tool                    | Mantis                                                                               | Msisensor-pro                                                                                     | Msisensor-pro                                                | Msisensor-pro                   | Msisensor-pro                                                                                                |
|                  |     | Cutoff                  | 40%                                                                                  | 10%                                                                                               | 10%                                                          | 10%                             | 10%                                                                                                          |
|                  |     | MSI parameter           | -mrq 20 -mlq 25 -mic 20 -mrr 1                                                       | -c 20                                                                                             | default parameters                                           | -c 20                           | -c20 -f0.05 -q3                                                                                              |
|                  | HRD | Segmentation            | ClinCNV                                                                              | Sequenza                                                                                          | Sequenza                                                     | Sequenza                        | Sequenza                                                                                                     |
|                  |     | Segmentation parameter  | --colNum 4 --lengths 9 --scoreS 200 --filterStep 2 --hg38<br>--reanalyseCohort FALSE | -w 50                                                                                             | default parameters                                           |                                 | sequenza-utils bam2seqz -gc hg19gc50base.wiggle<br>(gc_wiggle -w50 --> gc50base-wiggle --> -gc hg19gc50base) |
|                  |     | Scoring                 | scarHRD                                                                              | scarHRD                                                                                           | scarHRD                                                      | scarHRD                         | scarHRD                                                                                                      |
|                  |     | Scoring parameter       |                                                                                      |                                                                                                   | default parameters                                           |                                 | sequenza-result, ploidy0=ploidy, sizelimitLOH=15e6                                                           |
| Somatic variants |     | Variantcaller           | Strelka2                                                                             | VarScan2 + Mutect2                                                                                | Manta + Strelka2                                             | Dragen                          | Mutect2                                                                                                      |
|                  |     | Variantcaller parameter | --exome --indelCandidates [indelCandidates.vcf.gz]                                   | --min-coverage 8 (VarScan2);<br>--callable-depth 8 (Mutect2)                                      | -- CallRegion Agilent S33266340<br>--exome --indelCandidates | --vc-callability-tumor-thres 20 | --minimumMappingQuality=1 --minBaseQualityScore=10,<br>--intervalPadding=50                                  |
|                  |     | VAF threshold           | 0.05 in tumor && < 0.17*tumor_freq in normal                                         | 0.05                                                                                              | 0.05                                                         | 0.035 / 0.05                    | 0.05                                                                                                         |
|                  |     | Basequality             |                                                                                      | 28                                                                                                | 20                                                           |                                 | 25                                                                                                           |
|                  |     | Coverage threshold      | 20 (3 variant reads)                                                                 | 8x (4 Varianten Reads)                                                                            | 50                                                           | 50 - 200                        | 10                                                                                                           |
|                  |     | Annotation              | VEP                                                                                  | ANNOVAR + snpEff                                                                                  | ANNOVAR                                                      | ANNOVAR + snpEff                | VEP                                                                                                          |
| CNV              |     | Tool                    | ClinCNV                                                                              | Control-FREEC                                                                                     | Sequenza                                                     | Sequenza                        | Sequenza                                                                                                     |
|                  |     | CNV parameter           | --colNum 4 --lengths 9 --scoreS 200 --filterStep 2<br>--hg38 --reanalyseCohort FALSE | breakPointType: 4; breakPointThreshold: 1.2;<br>MinCNlength: 3; readCountThreshold: 50; window: 0 | ploidy = seq(1, 5.5, 0.1) ;<br>Female=TRUE/FALSE             |                                 | sequenza-utils bam2seqz -gc hg19gc50base.wiggle<br>(gc_wiggle -w50 --> gc50base-wiggle --> -gc hg19gc50base) |

Supplementary Table 3

|          |        |        |        |          |         |        |          |          |          |          |
|----------|--------|--------|--------|----------|---------|--------|----------|----------|----------|----------|
| ABCB1    | CAMTA1 | CRKL   | ERCC6  | GATA2    | JUN     | MMS19  | OSM      | PRKAR1A  | RSPO3    | TEK      |
| ABCB5    | CARD11 | CRTC1  | ERG    | GLI1     | KDM5A   | MN1    | OSMR     | PTCH1    | RUNX1    | TERT     |
| ABL1     | CBL    | CSF1R  | ERRF1  | GLI2     | KDM5C   | MPL    | P3H1     | PTCH2    | SBDS     | TET1     |
| ABL2     | CCND1  | CSF2RA | ESR1   | GLI3     | KDM6A   | MRE11  | PAK4     | PTEN     | SDHA     | TET2     |
| ABRAXAS1 | CCND2  | CSF3R  | ETS1   | GNA11    | KDR     | MS4A1  | PALB2    | PTGFR    | SDHAF2   | TFE3     |
| ADORA2A  | CCND3  | CTAG1B | EWSR1  | GNAQ     | KIF1B   | MSH2   | PARP1    | PTPN1    | SDHB     | TGFB1    |
| AIP      | CCNE1  | CTLA4  | EXT1   | GNAS     | KIR2DL1 | MSH6   | PARP2    | PTPN11   | SDHC     | TMEM127  |
| AKT1     | CCR2   | CTNNB1 | EXT2   | GPC3     | KIR2DL2 | MSLN   | PARP3    | PTPN12   | SDHD     | TMPRSS2  |
| AKT2     | CCR4   | CXCL12 | EZH2   | GPRC5A   | KIR2DL3 | MST1R  | PAX3     | PTPN2    | SEM1     | TMSB4X   |
| AKT3     | CCR5   | CXCR4  | FAM30A | GRM1     | KIT     | MTOR   | PAX5     | PTPRF    | SETD2    | TNFAIP3  |
| ALK      | CD19   | CYLD   | FANCA  | GSTM1    | KITLG   | MUTYH  | PAX7     | PTPRJ    | SF3B1    | TNFRSF18 |
| APC      | CD27   | CYP3A5 | FANCB  | GSTT1    | KLB     | MYB    | PBRM1    | PTPRK    | SHH      | TNFRSF4  |
| AR       | CD274  | DAXX   | FANCC  | H3F3A    | KMT2A   | MYC    | PDCC1    | RAB35    | SLC39A6  | TNFRSF9  |
| ARAF     | CD276  | DDB1   | FANCD2 | HAVCR2   | KMT2B   | MYCL1  | PDCC1LG2 | RAD18    | SLFN11   | TP53     |
| ARHGAP26 | CD40   | DDB2   | FANCE  | HDAC2    | KMT2C   | MYCN   | PDGFA    | RAD50    | SLX4     | TPTE     |
| ARHGAP6  | CD5    | DDIT3  | FANCF  | HEY1     | KMT2D   | MYCT1  | PDGFB    | RAD51    | SMAD4    | TRAP1    |
| ARHGEF12 | CD70   | DDR1   | FANCG  | HGF      | KRAS    | MYD88  | PDGFRA   | RAD51AP1 | SMARCA4  | TRIM37   |
| ARID1A   | CD79B  | DDR2   | FANCI  | HLA-A    | KSR2    | MYEOV  | PDGFRB   | RAD51B   | SMARCAL1 | TSC1     |
| ASCL1    | CD99   | DICER1 | FANCL  | HORMAD1  | LAG3    | MYOD1  | PELP1    | RAD51C   | SMARCB1  | TSC2     |
| ASPSCR1  | CDC73  | DIS3L2 | FANCM  | HORMAD2  | LATS1   | NAB2   | PHF1     | RAD51D   | SMARCE1  | TSHR     |
| ATM      | CDH1   | DLEU1  | FAS    | HPS1     | LCK     | NAMPT  | PHF6     | RAD54B   | SMO      | TSSK3    |
| ATR      | CDH17  | DLL3   | FASLG  | HRAS     | LIG1    | NBN    | PHLPP1   | RAD54L   | SOCS1    | TYR      |
| ATRX     | CDK1   | DNMT3A | FBXW7  | HSP90AA1 | LMTK3   | NCOA2  | PHOX2B   | RAF1     | SOX10    | UBE2N    |
| AURKA    | CDK12  | DOT1L  | FGF1   | HSP90AB1 | LPP     | NDRG1  | PIK3C2G  | RAP1B    | SPTA1    | USP11    |
| AURKC    | CDK2   | DUX4   | FGF2   | HSP90B1  | LZTR1   | NF1    | PIK3CA   | RARA     | SRC      | USP6     |
| AXL      | CDK4   | EGF    | FGF3   | ICOS     | MAGEA3  | NF2    | PIK3CD   | RASA1    | SRSF2    | VEGFA    |
| B2M      | CDK5   | EGFL7  | FGF4   | ID2      | MALAT1  | NFATC1 | PIK3R1   | RASA2    | SS18     | VEGFB    |
| BAP1     | CDK6   | EGFR   | FGFR1  | ID3      | MAML2   | NFIB   | PIK3R2   | RB1      | SSRP1    | VHL      |
| BARD1    | CDK9   | EGLN1  | FGFR2  | IDH1     | MAP2K1  | NFKBIA | PIK3R5   | RECQL    | SSTR1    | VSIR     |
| BCL2     | CDKN1A | EGLN2  | FGFR3  | IDH2     | MAP2K2  | NFKBIE | PIM1     | RECQL4   | SSTR2    | WIF1     |
| BCL3     | CDKN1B | EHBP1  | FGFR4  | IDO1     | MAP3K1  | NOTCH1 | PIM2     | RET      | SSTR3    | WNK2     |
| BCL6     | CDKN1C | EP300  | FH     | IDO2     | MAP3K6  | NOTCH2 | PLAG1    | RHBDF2   | SSTR4    | WRN      |
| BCL9     | CDKN2A | EPAS1  | FLCN   | IGF1R    | MAX     | NR4A3  | PLK1     | RHEB     | SSTR5    | WT1      |
| BCOR     | CDKN2B | EPCAM  | FLI1   | IKZF1    | MCL1    | NRAS   | PLK2     | RHOA     | SSX1     | WWTR1    |
| BLM      | CDKN2C | EPHA3  | FLT1   | IL21R    | MDH2    | NRG1   | PLK3     | RICTOR   | SSX2     | XAB2     |
| BMPR1A   | CDKN2D | EPHA5  | FLT3   | IL6      | MDM2    | NRG2   | PMEL     | RINT1    | STAT3    | XPA      |
| BRAF     | CEBPA  | EPHB2  | FLT4   | IL6R     | MDM4    | NRG3   | PMS1     | RIT1     | STAT5B   | XPC      |
| BRCA1    | CEP57  | ERBB2  | FOLH1  | IL6ST    | MED12   | NRG4   | PMS2     | RNF2     | STAT6    | XPO1     |
| BRCA2    | CHEK1  | ERBB3  | FOXL2  | IL7R     | MEN1    | NSD1   | PNKP     | RNF43    | STK11    | XRCC1    |
| BRD2     | CHEK2  | ERBB4  | FOXO1  | IRF4     | MERTK   | NT5E   | POLD1    | ROR1     | STK36    | XRCC2    |
| BRD3     | CIC    | ERCC1  | FOXP1  | IRS2     | MET     | NTRK1  | POLE     | ROS1     | SUFU     | XRCC3    |
| BRD4     | CLDN18 | ERCC2  | FUS    | JAK1     | MITF    | NTRK2  | PPM1D    | RPA1     | SUZ12    | YAP1     |
| BRIP1    | CLDN6  | ERCC3  | FYN    | JAK2     | MLH1    | NTRK3  | PRAME    | RPTOR    | SYK      | YWHAE    |
| BTK      | CREBBP | ERCC4  | GAK    | JAK3     | MLH3    | NUDT1  | PRF1     | RRAS2    | TACSTD2  | ZNF217   |
| BUB1B    | CREBRF | ERCC5  | GAS6   | JAZF1    | MLLT1   | NUTM1  | PRKACA   | RSPO2    | TEAD1    |          |
